# Supplementary material for: Elevation of ADAM12 facilitates tumor progression by enhancing metastasis and immune infiltration in gastric cancer
Source: PubMed Central journal article supplement — Int J Oncol. 2022 Mar 21;60(5):51. doi: 10.3892/ijo.2022.5341 (PMC8973920; doi:10.3892/ijo.2022.5341), 2022-03-21

Figure S1. Immunohistochemical analysis showing expression of ADAM12 in 63 pairs of human GC and adjacent non-tumor tissues in a microarray. The odd columns (columns A, C, E, G, I, K, M) represent tumor tissues and the even columns (columns B, D, F, H, J, L, N) represent corresponding adjacent non-tumor tissues. ADAM12, a disintegrin and metalloprotease 12; GC, gastric cancer.

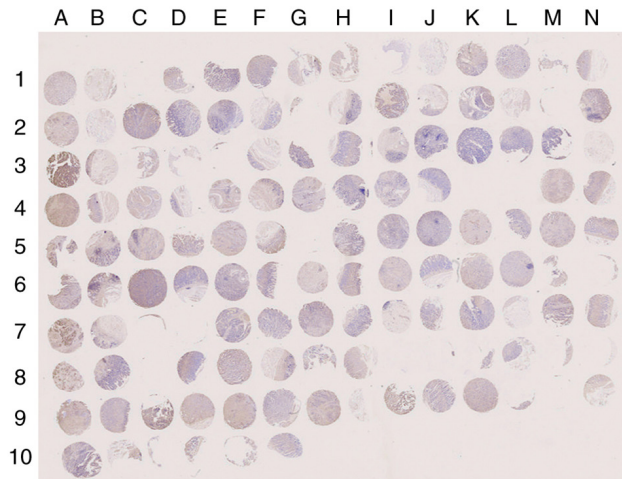

Figure S2. The Kaplan-Meier survival curve of DFS for the high and low ADAM12 expression groups based on the IHC score from a tissue microarray. DFS, disease-free survival; ADAM12, a disintegrin and metalloprotease 12; GC, gastric cancer; IHC, immunohistochemistry.

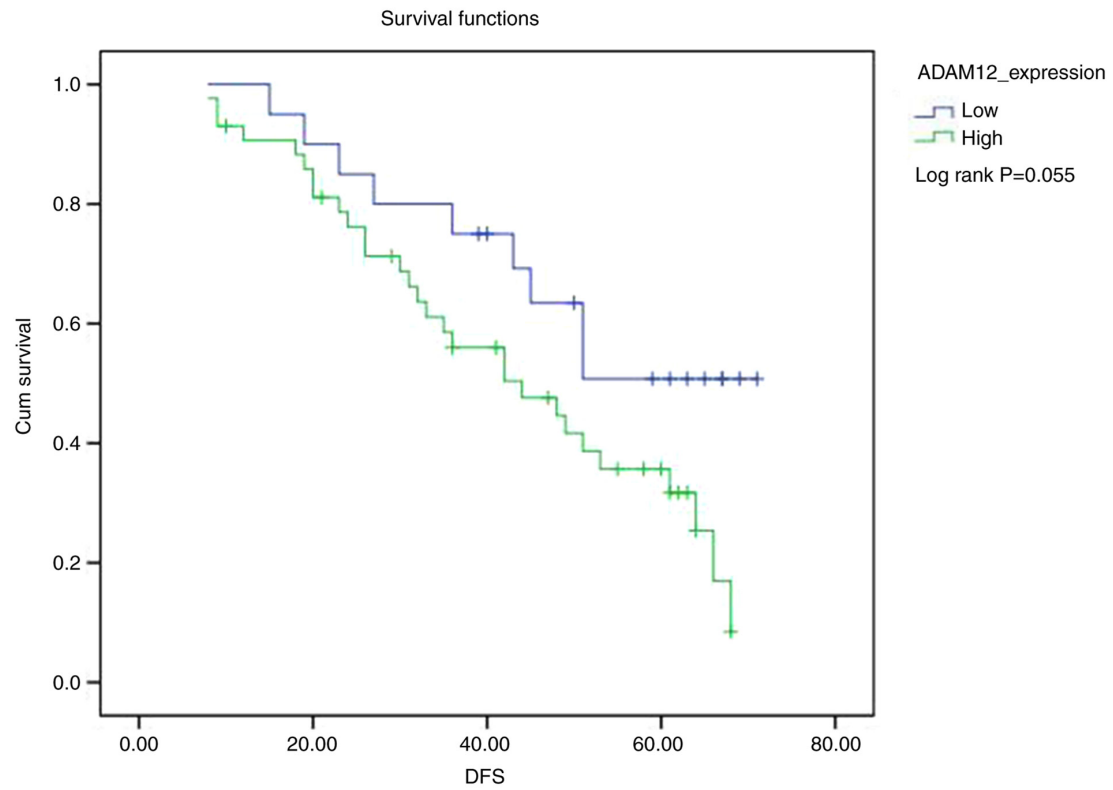

Figure S3. hsa-miR-29c-3p and has-miR-135a-5p significantly inhibit the expression of ADAM12 in GC. (A) The levels of hsa-miR-29c-3p and has-miR-135a-5p were determined in HGC27 cells which transfected with the miR-NC and corresponding miRNA mimics by RT-qPCR (\*\*P<0.001, \*\*\*\*P<0.0001). (B) The protein levels of ADAM12 were determined in the hsa-miR-29c-3p and has-miR-135a-5p overexpressed HGC27 cells via western blot assay. ADAM12, a disintegrin and metalloprotease; GC, gastric cancer.

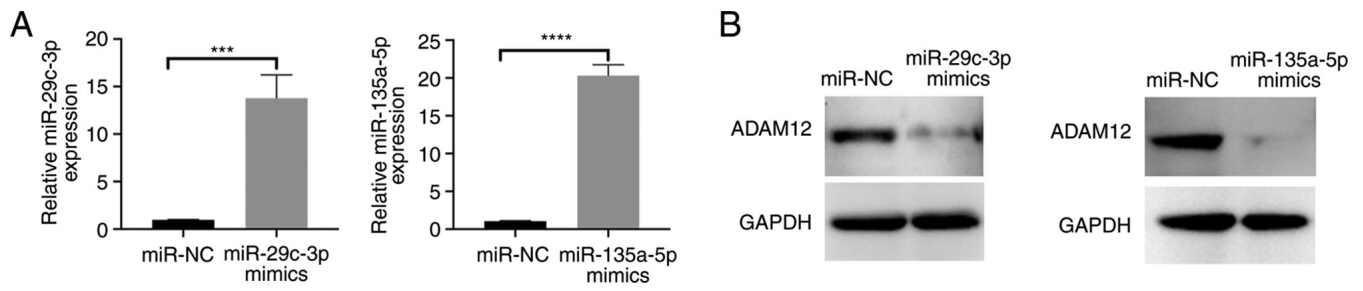

Figure S4. Knockdown and overexpression efficiency of ADAM12 in HGC27 and AGS cells, respectively. ADAM12, a disintegrin and metalloprotease; GC, gastric cancer.

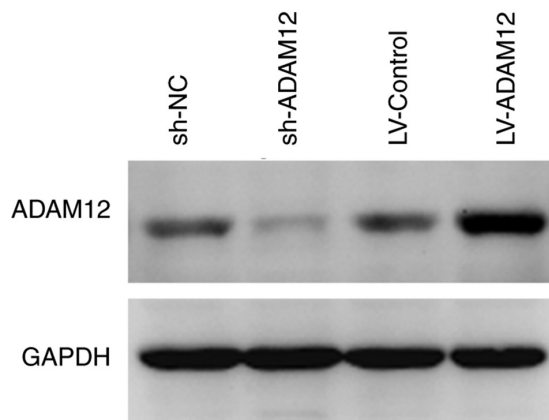

Supplement: Supplementary_Data1.pdf [file Supplementary_Data1.pdf]
