# Supplementary material for: Elevation of ADAM12 facilitates tumor progression by enhancing metastasis and immune infiltration in gastric cancer
Source: PubMed Central journal article supplement — Int J Oncol. 2022 Mar 21;60(5):51. doi: 10.3892/ijo.2022.5341 (PMC8973920; doi:10.3892/ijo.2022.5341), 2022-03-21
Supplement: Supplementary_Data2.pdf [file Supplementary_Data2.pdf]

| Table SI. shRNA and miRNA mimic sequences used in this study.       |                        |
|---------------------------------------------------------------------|------------------------|
| Gene                                                                | Sequence (5'-3')       |
| sh-NC                                                               | GCTTCGCGCCGTAGTCTTA    |
| sh-ADAM12                                                           | GCCTGAATCGTCAATGTCAA   |
| mimics-NC                                                           | UUCUCCGAACGUGUCACGUTT  |
| mimics miR-29c-3p                                                   | UAGCACCAUUUGAAAUCGGUU  |
| mimics miR-135a-5p                                                  | UAUGGCUUUUUAUCCUAUGUGA |
| NC, negative control; ADAM12, a disintegrin and metalloprotease 12. |                        |

| Table SII. Antibodies used in this study. |                         |             |                         |
|-------------------------------------------|-------------------------|-------------|-------------------------|
| Antibody name                             | Manufacturer            | Catalog no. | Working concentration   |
| Anti-ADAM12                               | ProteinTech Group, Inc. | 14139-1-AP  | WB, 1:2,000; IHC, 1:500 |
| Anti-E-cadherin                           | ProteinTech Group, Inc. | 20874-1-AP  | WB, 1:5,000             |
| Anti-N-cadherin                           | ProteinTech Group, Inc. | 22018-1-AP  | WB, 1:2,000             |
| Anti-vimentin                             | ProteinTech Group, Inc. | 10366-1-AP  | WB, 1:5,000             |
| Anti-TGF- $\beta$ 1                       | ProteinTech Group, Inc. | 21898-1-AP  | WB, 1:2,000             |
| Anti-MMP-2                                | ProteinTech Group, Inc. | 10373-2-AP  | WB, 1:1,000             |
| Anti-MMP-9                                | ProteinTech Group, Inc. | 10375-2-AP  | WB, 1:1,000             |
| GAPDH                                     | ProteinTech Group, Inc. | 10494-1-AP  | WB, 1:10,000            |

ADAM12, a disintegrin and metalloprotease 12; TGF- $\beta$ 1, transforming growth factor  $\beta$ 1; MMP, matrix metalloproteinase; GAPDH, glyceraldehyde 3-phosphate dehydrogenase; WB, western blotting; IHC, immunohistochemistry.

| Table SIII. Primer sequence for RT-qPCR.                                                       |                              |
|------------------------------------------------------------------------------------------------|------------------------------|
| Gene                                                                                           | Sequence (5'-3')             |
| <i>ADAM12-F</i>                                                                                | AGCTATGTCTTAGAACCAATGAAAAGTG |
| <i>ADAM12-R</i>                                                                                | CCCCGGACGCTTTTCAG            |
| <i>miR-29c-3p-F</i>                                                                            | ACACTCCAGCTGGTAGCACCATTGAAAT |
| <i>miR-29c-3p-R</i>                                                                            | TGGTGTCTGGAGTCG              |
| <i>miR-135a-5p-F</i>                                                                           | CCGGCCTATGGCTTTTTATTCC       |
| <i>miR-135a-5p-R</i>                                                                           | CAGTGCAGGGTCCGAGGT           |
| <i>GAPDH-F</i>                                                                                 | CACCCAGAAGACTGTGGATGG        |
| <i>GAPDH-R</i>                                                                                 | GTCTACATGGCAACTGTGAGG        |
| <i>U6-F</i>                                                                                    | ATTGGAACGATACAGAGAAGATT      |
| <i>U6-R</i>                                                                                    | GGAACGCTTCACGAATTTG          |
| ADAM12, a disintegrin and metalloprotease 12; GAPDH, glyceraldehyde 3-phosphate dehydrogenase. |                              |
